# Supplementary material for: Controlling carbon monoxide binding at di-iron units related to the iron-only hydrogenase sub-site
Source: Royal Society of Chemistry journal article supplement (doi:10.1039/b712805c), 2008-01-01
Supplement: b712805c.pdf [file b712805c.pdf]

## **Controlling Carbon Monoxide Binding at Di-iron Units Related to the Iron-only Hydrogenase Sub-site**

Fenfen Xu<sup>a</sup>, Cédric Tard<sup>b</sup>, Xiufeng Wang<sup>a</sup>, Saad K Ibrahim<sup>b</sup>, David L Hughes<sup>b</sup>, Wei Zhong<sup>a</sup>, Xirui Zeng<sup>c</sup>, Qiuyan Luo<sup>c</sup>, Xiaoming Liu<sup>a, \*</sup> and Christopher J Pickett<sup>b, \*</sup>

### **Complexes used in this study**

Complexes **1**, **7** and **8** were synthesised as previously described [1,2]. The complexes **2**, **3**, **5**, **6**, **9** and **B** ( X = CH<sub>2</sub>OH) are new and were synthesised by an extension of the general method used to synthesise **7** and **8**. The syntheses of [Fe<sub>2</sub>(CO)<sub>5</sub>{CH<sub>3</sub>C(CH<sub>2</sub>S)<sub>2</sub>CH<sub>2</sub>S(C<sub>6</sub>H<sub>4</sub>)-*p*-CN}], **2** and [Fe<sub>2</sub>(CO)<sub>5</sub>{CH<sub>3</sub>C(CH<sub>2</sub>S)<sub>2</sub>(2-pyridine)}] **6** are illustrative and these are described in detail.

[Fe<sub>2</sub>(CO)<sub>5</sub>{CH<sub>3</sub>C(CH<sub>2</sub>S)<sub>2</sub>CH<sub>2</sub>S(C<sub>6</sub>H<sub>4</sub>)-*p*-CN}], **2**.

**(a) synthesis of ligand, CH<sub>3</sub>C(CH<sub>2</sub>S)<sub>2</sub>CH<sub>2</sub>S(C<sub>6</sub>H<sub>4</sub>)-*p*-CN, 4-((4-benzonitrilethio)methyl)-4-methyl-1,2-dithiolane**

NaH (60 % oil suspension, 0.38 g, 9.4 mmol) was washed with hexane and then dissolved in THF (80 cm<sup>3</sup>) under a dinitrogen atmosphere. 4-methyl-[1,2] dithiolan-4-yl)methanethiol (0.76 g, 4.6 mmol) was dissolved in THF (5 cm<sup>3</sup>) , added to the solution of NaH and stirred at room temperature. 4-bromo-nitrobenzene (0.93 g, 5.1 mmol) was dissolved in THF (5 cm<sup>3</sup>), added to the mixture and stirred at 75 °C overnight. Excess of sodium hydride was quenched by ammonium chloride-saturated water and the product was extracted with dichloromethane. The organic phase was dried (MgSO<sub>4</sub>) and purified by flash chromatography (hexane/chloroform 1:2) to give a red-brown solid (0.30 g, 1.1 mmol, 24 %). Microanalysis: C, H, N, Found (calculated) C<sub>12</sub>H<sub>13</sub>NS<sub>3</sub> , C, 54.32; H, 5.07; N, 4.96; S, 35.71 (C, 53.90; H, 4.90; N,

5.24; s, 35.97);  $\delta_{\text{H}}$  (400 MHz; solvent  $\text{CDCl}_3$ ; standard  $\text{SiMe}_4$ ) 1.37 (3H, s,  $\text{CH}_3$ ), 2.96 (2H, d,  $J$  11.7 Hz,  $\text{CH}_2\text{SS}$ ), 3.15 (2H, d,  $J$  11.4 Hz,  $\text{CH}_2\text{SS}$ ), 3.24 (2H, s,  $\text{CH}_2\text{SPh}$ ), 7.39 (2H, d,  $J$  8.5 Hz, Ph), 7.54 (2H, d,  $J$  8.5 Hz, Ph);  $\nu_{\text{max}}/\text{cm}^{-1}$  (CN) 2217 (nujol).

**(b)  $[\text{Fe}_2(\text{CO})_5\{\text{CH}_3\text{C}(\text{CH}_2\text{S})_2\text{CH}_2\text{S}(\text{C}_6\text{H}_4)\text{-}p\text{-CN}\}]$ , **2**:**  $[\text{Fe}_3(\text{CO})_{12}]$  (0.62 g, 1.2 mmol) was dissolved in toluene (50  $\text{cm}^3$ ). **I** (0.30 g, 1.1 mmol) was added to the solution. The dark green mixture turned red brown when it was heated at 75 °C for 90 min. The solvent was removed and the compound was purified by flash chromatography under dinitrogen (diethyl ether/hexane 2:1) to give a red-brown powder (0.19 g, 0.37 mmol, 33 %).

**$[\text{Fe}_2(\text{CO})_5\{\text{CH}_3\text{C}(\text{CH}_2\text{S})_2\text{CH}_2\text{S}(\text{C}_6\text{H}_4)\text{-}p\text{-CN}\}]$ , **2**:** Microanalysis: C, H, N Found (calculated),  $\text{C}_{17}\text{H}_{13}\text{NO}_5\text{S}_3\text{Fe}_2$ , 39.52, 2.76, 2.68 (39.33; 2.52; 2.70)  $\nu_{\text{max}}/\text{cm}^{-1}$  (CO) 1933, 1988 and 2051 (CN) 2232 (acetonitrile);  $\delta_{\text{H}}$  (400 MHz; solvent  $\text{CDCl}_3$ ; standard  $\text{SiMe}_4$ ) 0.93 (3H, s,  $\text{CH}_3$ ), 1.72 (2H, d,  $J$  14.1 Hz,  $\text{CH}_2\text{SFe}$ ), 2.30 (2H, d,  $J$  14.2 Hz,  $\text{CH}_2\text{SFe}$ ), 2.40 (2H, s,  $\text{CCH}_2\text{SPh}$ ), 7.76 (2H, d,  $J$  8.0 Hz, Ph), 7.90 (2H, d,  $J$  8.3 Hz, Ph).

**$[\text{Fe}_2(\text{CO})_5\{\text{CH}_3\text{C}(\text{CH}_2\text{S})_2\text{CH}_2\text{S}(\text{C}_6\text{H}_4)\text{-}p\text{-NO}_2\}]$ , **3**:** Microanalysis: C, H, N Found (calculated),  $\text{C}_{16}\text{H}_{13}\text{NO}_7\text{S}_3\text{Fe}_2$ , 35.74; 2.50; 2.67 (35.64; 2.43; 2.60).  $\nu_{\text{max}}/\text{cm}^{-1}$  (CO) 1933, 1988 and 2052 (acetonitrile);  $\delta_{\text{H}}$  (400 MHz; solvent  $\text{CDCl}_3$ ; standard  $\text{SiMe}_4$ ) 0.95 (3H, s,  $\text{CH}_3$ ), 1.74 (2H, d,  $J$  13.9 Hz,  $\text{CH}_2\text{SFe}$ ), 2.32 (2H, d,  $J$  13.9 Hz,  $\text{CH}_2\text{SFe}$ ), 2.44 (2H, s,  $\text{CCH}_2\text{SPh}$ ), 7.95 (2H, d,  $J$  8.8 Hz, Ph), 8.33 (2H, d,  $J$  8.8 Hz, Ph).

**$\text{Fe}_2(\text{CO})_5\{\text{CH}_3\text{C}(\text{CH}_2\text{S})_2\text{CH}_2\text{S}(\text{C}_6\text{H}_4)\text{-}p\text{-NH}_2\}$ , **5**:** Microanalysis: C, H, N Found (calculated),  $\text{C}_{16}\text{H}_{15}\text{NO}_5\text{S}_3\text{Fe}_2$ , 37.76; 2.99; 2.66 (37.74; 2.97; 2.75).  $\nu_{\text{max}}/\text{cm}^{-1}$  (CO) 1928, 1983 and 2048 (acetonitrile);  $\delta_{\text{H}}$  (400 MHz; solvent  $\text{CDCl}_3$ ; standard  $\text{SiMe}_4$ ) 0.83 (3H, s,  $\text{CH}_3$ ), 1.66 (2H, d,  $J$  13.7 Hz,  $\text{CH}_2\text{SCaromatic}$ ), 2.25 (4H, d,  $J$  13.4 Hz,  $2\times\text{CH}_2\text{SFe}$ ), 3.95 (2H, s,  $\text{NH}_2$ ), 7.95 (2H, d,  $J$  8.8 Hz, Ph), 8.33 (2H, d,  $J$  8.8 Hz, Ph).

Note: complex **4** was generated *in situ* by treatment of **5** with 1.2 equivalents of HBF<sub>4</sub>·Me<sub>2</sub>O in MeCN under CO at 1 atmosphere.

**[Fe<sub>2</sub>(CO)<sub>5</sub>{CH<sub>3</sub>C(CH<sub>2</sub>S)<sub>2</sub>(2-pyridine)}]** (A, X = 2-pyridine), **6**: To a solution of Fe<sub>3</sub>(CO)<sub>12</sub> (0.216, 0.4mmol) in dry toluene (5ml) was added 2-methyl-2-(pyridin-2-yl)propane-1,3-dithiol (0.079g, 0.4mmol) in dry toluene (10ml) under N<sub>2</sub>. The reaction was heated at 110 °C for 4 hours with stirring. After removing the solvent, the reaction residues were purified using flash chromatography (eluting system: ethyl acetate and *n*-hexane at a ratio of 1:4). A greenish brown band was collected. Removal of the solvents under vacuum yielded a black-green solid. The crude product was redissolved in CH<sub>3</sub>CN (10ml) and insoluble materials were filtered off under N<sub>2</sub>. Both slow evaporation and storing at low temperature (-20 °C) of the filtrate gave single crystals suitable for X-ray diffraction structural determination. Microanalysis: C, H, N Found (calculated), C<sub>14</sub>H<sub>11</sub>NO<sub>5</sub>S<sub>2</sub>Fe<sub>2</sub>, 37.40; 2.50; 3.15 (37.44; 2.47; 3.12). FTIR (CH<sub>3</sub>CN) ν<sub>CO</sub>: 2048.6, 1978.2, 1914.1 cm<sup>-1</sup>; MS (ES<sup>+</sup>): (M+1)/z = 450.8, (M-CO+1)/z = 422.3. Protonation of **6** in dichloromethane using excess HBF<sub>4</sub>·Et<sub>2</sub>O under CO atmosphere produces the moisture-sensitive hexacarbonyl complex **C** (X = 2-pyridinium) **5**. Storing this solution in dichloromethane at low temperature produces single crystals suitable for structure analysis. The infrared spectrum has the characteristic IR pattern of a diiron hexacarbonyl complex.

**[Fe<sub>2</sub>(CO)<sub>5</sub>{CH<sub>3</sub>C(CH<sub>2</sub>S)<sub>2</sub>(CH<sub>2</sub>NH<sub>2</sub>)}]** (A, X= CH<sub>2</sub>NH<sub>2</sub>), **9**: Microanalyses: C, H, N Found (calculated), C<sub>10</sub>H<sub>11</sub>NO<sub>5</sub>S<sub>2</sub>Fe<sub>2</sub>, 29.63; 2.72; 3.61 (29.95; 2.76; 3.49). FTIR (acetonitrile) ν<sub>CO</sub>: 2043.9, 1972.1, 1906.5 cm<sup>-1</sup>. MS (ESI, -): (m+1)/z = 402. <sup>1</sup>H NMR (CDCl<sub>3</sub>): 0.704 (s, 3H), 1.692 (d, 2H, J=13.4Hz), 2.173 (broad, 2H), 2.335 (d, 2H, J=13.6Hz), 2.663 (broad, 2H).

Supplementary Material (ESI) for Chemical Communications  
This journal is (c) The Royal Society of Chemistry 2007

**[Fe<sub>2</sub>(CO)<sub>6</sub>{CH<sub>3</sub>C(CH<sub>2</sub>S)<sub>2</sub>CH<sub>2</sub>OH}] (B, X = CH<sub>2</sub>OH):** Microanalyses: C, H, N

Found (calculated), C<sub>11</sub>H<sub>10</sub>O<sub>7</sub>S<sub>2</sub>Fe<sub>2</sub>, 30.68; 2.47; <0.1 (30.72; 2.34; 0.00). FTIR

(CH<sub>3</sub>CN)  $\nu_{\text{CO}}$ : 2074.1, 2033.7, 1998 cm<sup>-1</sup>

[1] M. Razavet, S.C. Davies, D.L. Hughes and C.J. Pickett, *Chem. Commun.*, 2001, 847-848.

[2] M. Razavet, S.C. Davies, D.L. Hughes, J.E. Barclay, D.J. Evans, S.A. Fairhurst, X. Liu and C.J. Pickett, *Dalton Trans.*, 2003, 586-595.
